# Supplementary material for: Integration of proteomic and transcriptomic profiles reveals multiple levels of genetic regulation of salt tolerance in cotton
Source: PubMed Central journal article supplement (PMC6011603; doi:10.1186/s12870-018-1350-1), 2018-06-20
Supplement: 12870_2018_1350_MOESM2_ESM.pdf [file 12870_2018_1350_MOESM2_ESM.pdf]

## **Supplementary Materials**

# **Integration of proteomic and transcriptomic profiles reveals multiple levels of genetic regulation of salt tolerance in cotton**

Zhen Peng, Shoupu He, Wenfang Gong, Feifei Xu, Zhaoe Pan, Yinhua Jia, Xiaoli Geng, Xiongming Du\*

\* To whom correspondence should be addressed

Address: State Key Laboratory of Cotton Biology, Institute of Cotton Research, Chinese Academy of Agricultural Sciences, Anyang, Henan 455000, China

Telephone: +086-0372-2562252,

Fax: +086-0372-2562256

Email: dujeffrey8848@hotmail.com

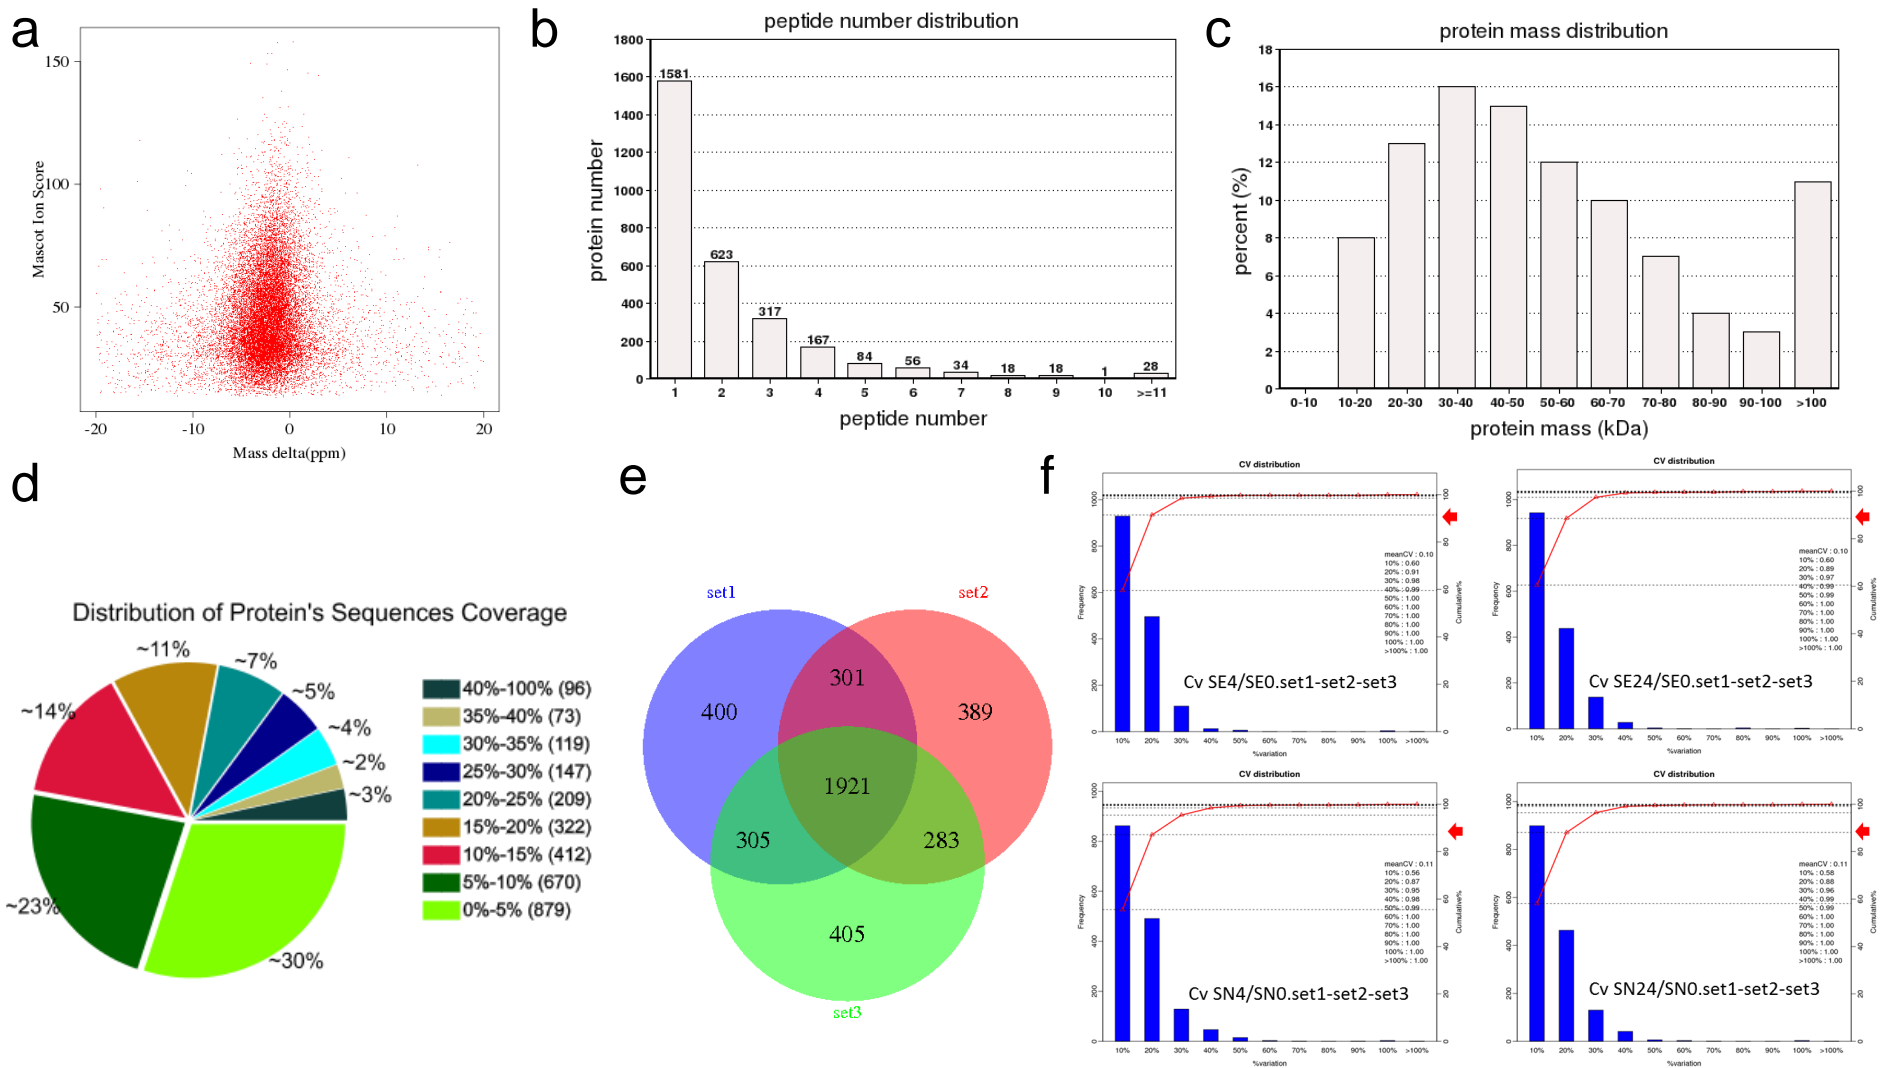

**Figure S1:** Basic information of protein identification. (a) Mass delta; (b) Peptide Number; (c) Protein Mass; (d) Coverage; (e) Basic identify; (f) Repeatability.

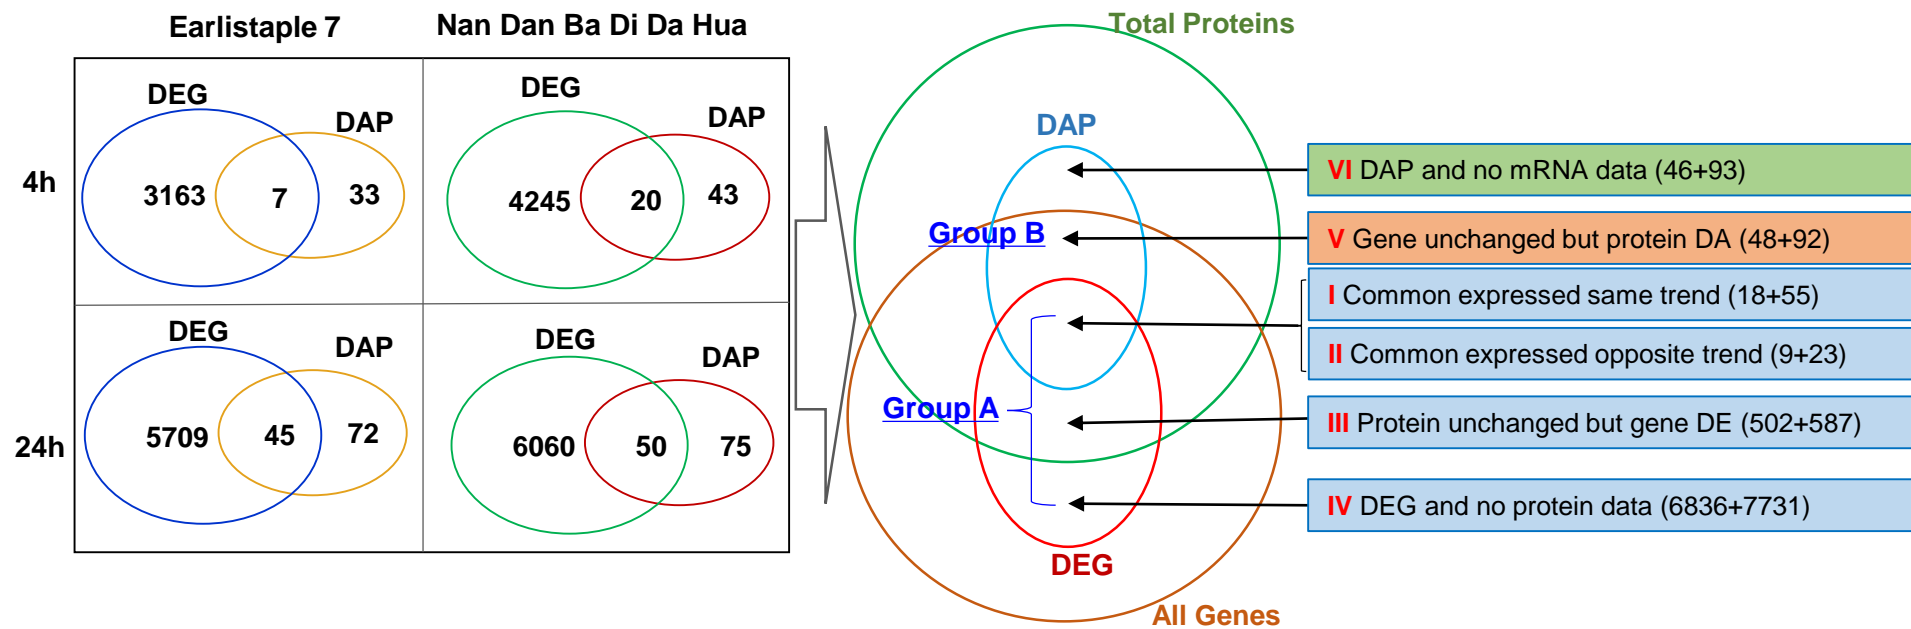

**Figure S2** : Integrative analysis of the proteome and mRNA-seq

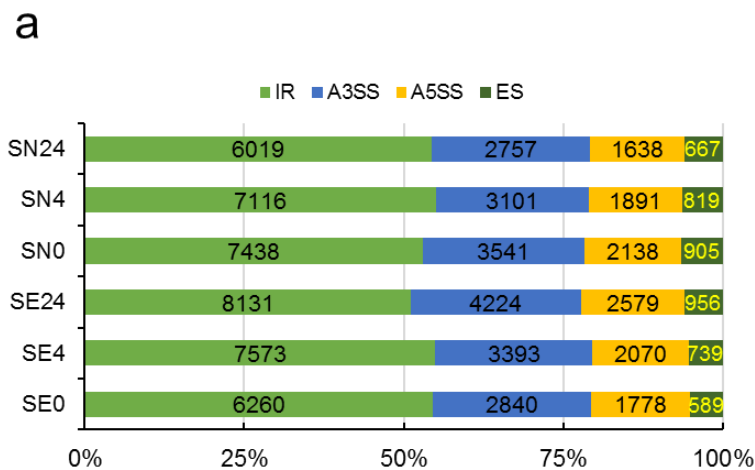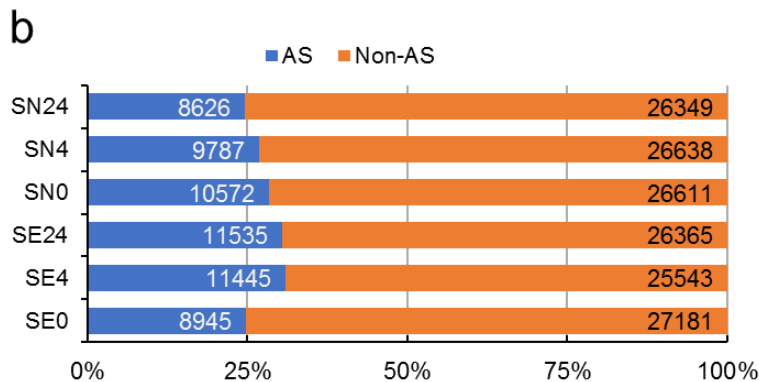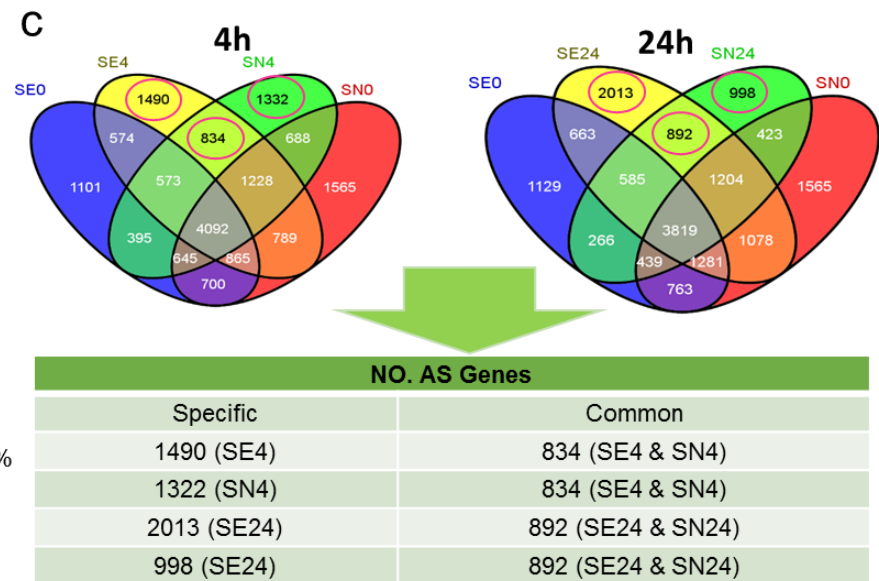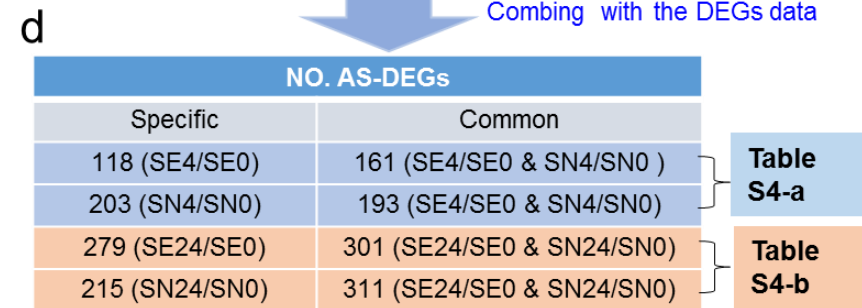

**Figure S3** : Global comparison of alternative splicing events and genes.

- The number and percent of intron retention, alternative 5' splice site, alternative 3' splice site and exon-skipping events under control and salt conditions in two genotypes.
- The number and percent of alternative splicing genes and non-alternative splicing genes.
- The number of specific and common AS genes in 4h or/and 24h of salt-treatment sample,
- Combing all identified specific and common AS genes sets in 4h or/and 24h of salt-treatment sample with the corresponding DEGs data.

| Sample | 28 Known DE miRNA | Target     | miRNA::Target | 123 Novel DE miRNA | Target     | miRNA::Target |
|--------|-------------------|------------|---------------|--------------------|------------|---------------|
| E4/E0  | 12                | 85         | 163           | 53                 | 593        | 710           |
| E24/E0 | 17                | 165        | 273           | 62                 | 623        | 808           |
| N4/N0  | 2                 | 8          | 16            | 40                 | 413        | 502           |
| N24/N0 | 11                | 34         | 61            | 48                 | 424        | 475           |
| Total  | <b>28</b>         | <b>209</b> | <b>349</b>    | <b>106</b>         | <b>929</b> | <b>1289</b>   |

**Fig S4.** The number of differentially expressed identified known and novel miRNAs in four comparisons. The differentially expressed identified known and novel miRNAs' targets predicted using psRNATarget web software online (<http://plantgrn.noble.org/psRNATarget/>)

**Figure S5:** Expression profiles of 12 known and 5 novel miRNAs in two cotton genotypes from control (0) and salt-treated (4- and 24-h) samples by RT-PCR assays (left panel) and small RNA sequencing (right panel).

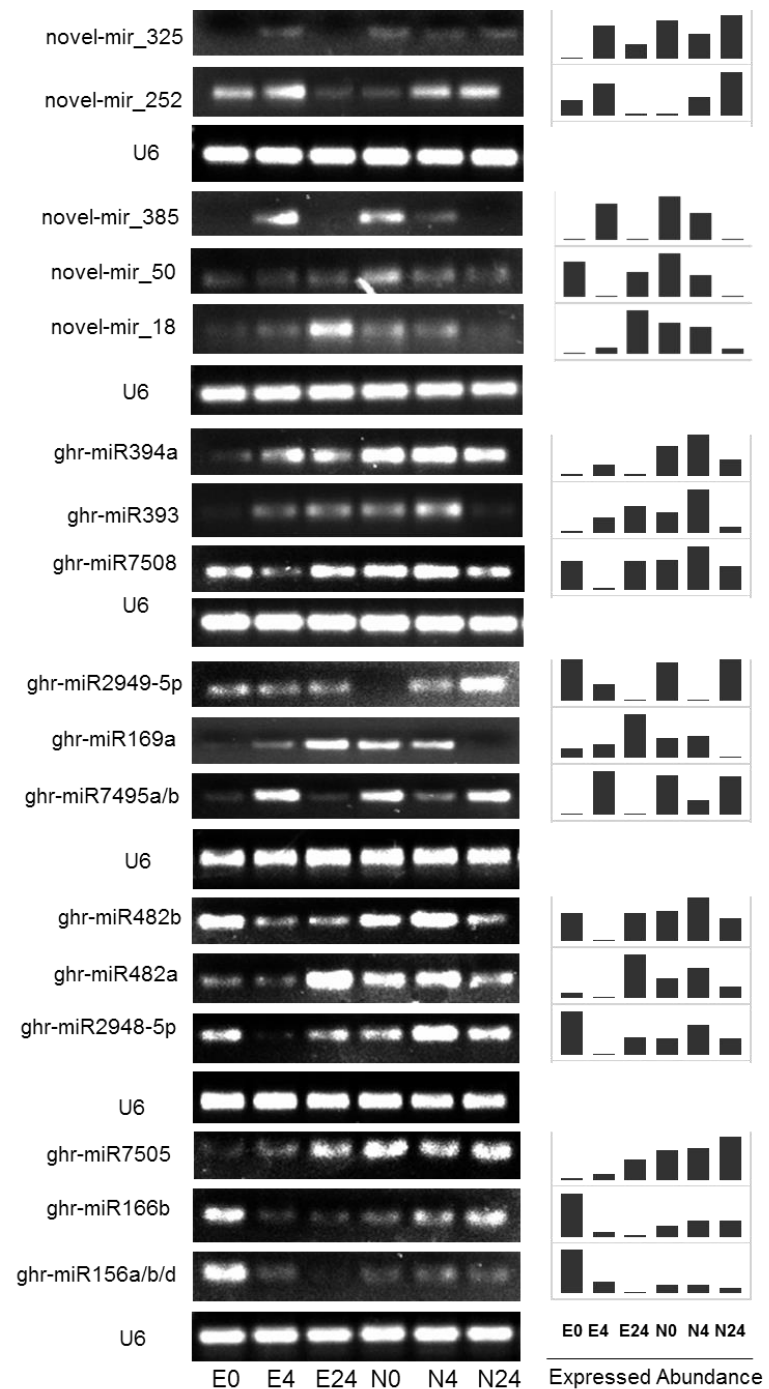

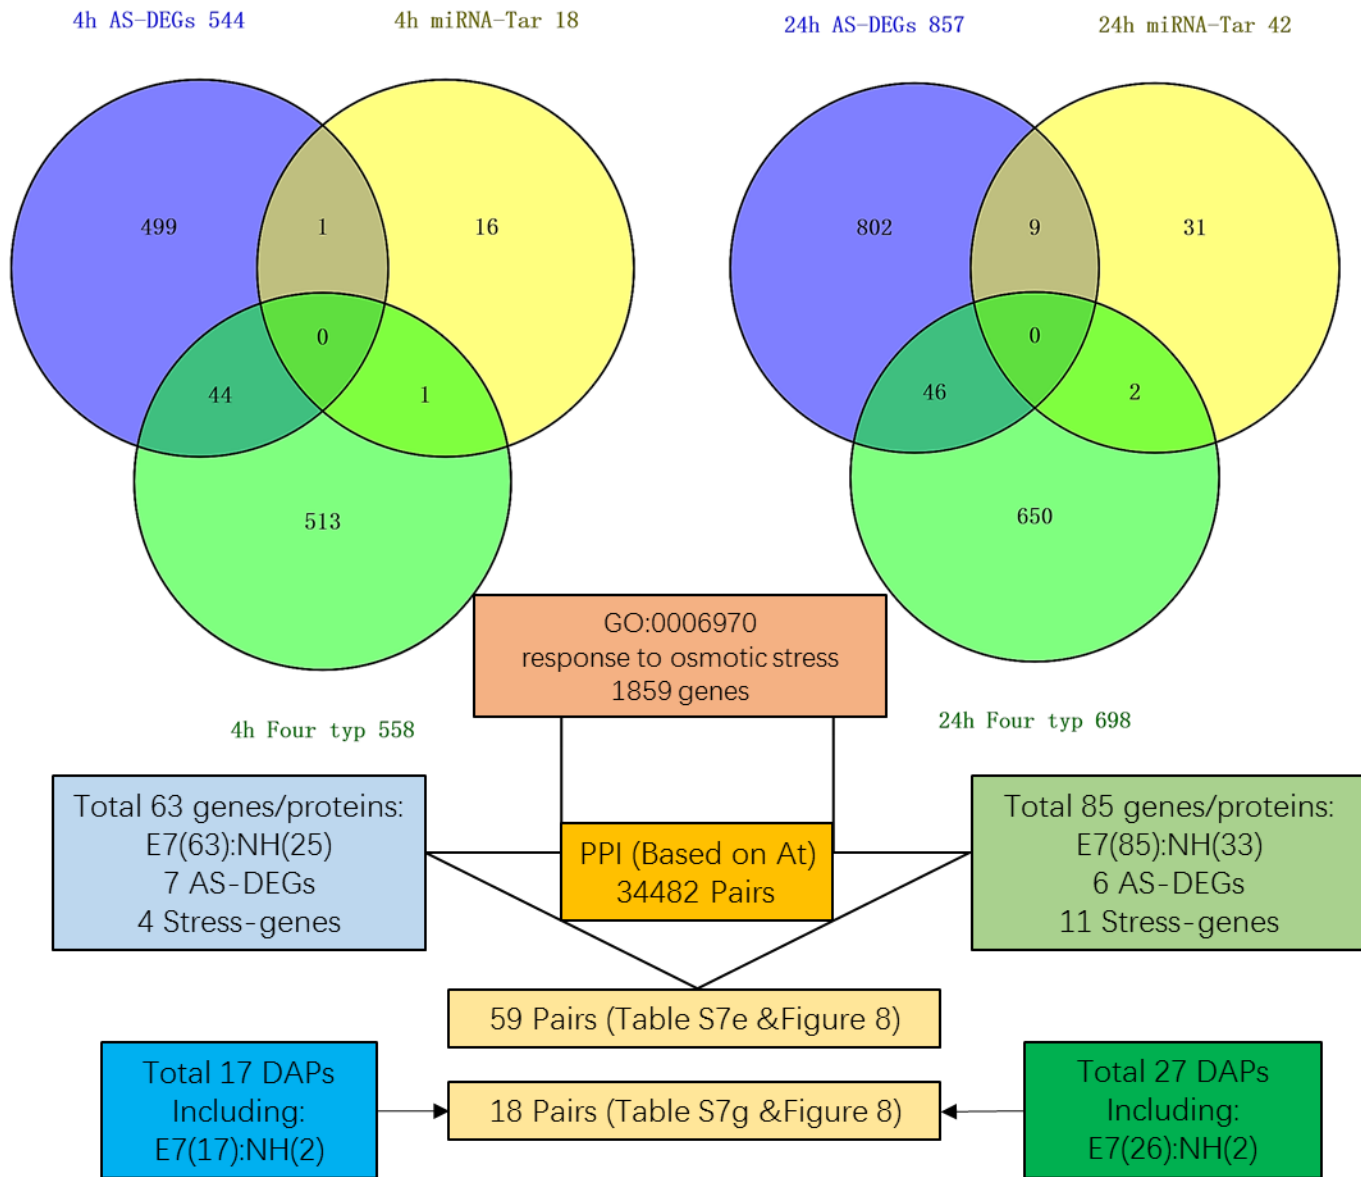

**Figure S6:** Flowchart analysis of the distinct genes/proteins between E7 and NH adapted to salt stress and protein–protein interaction.

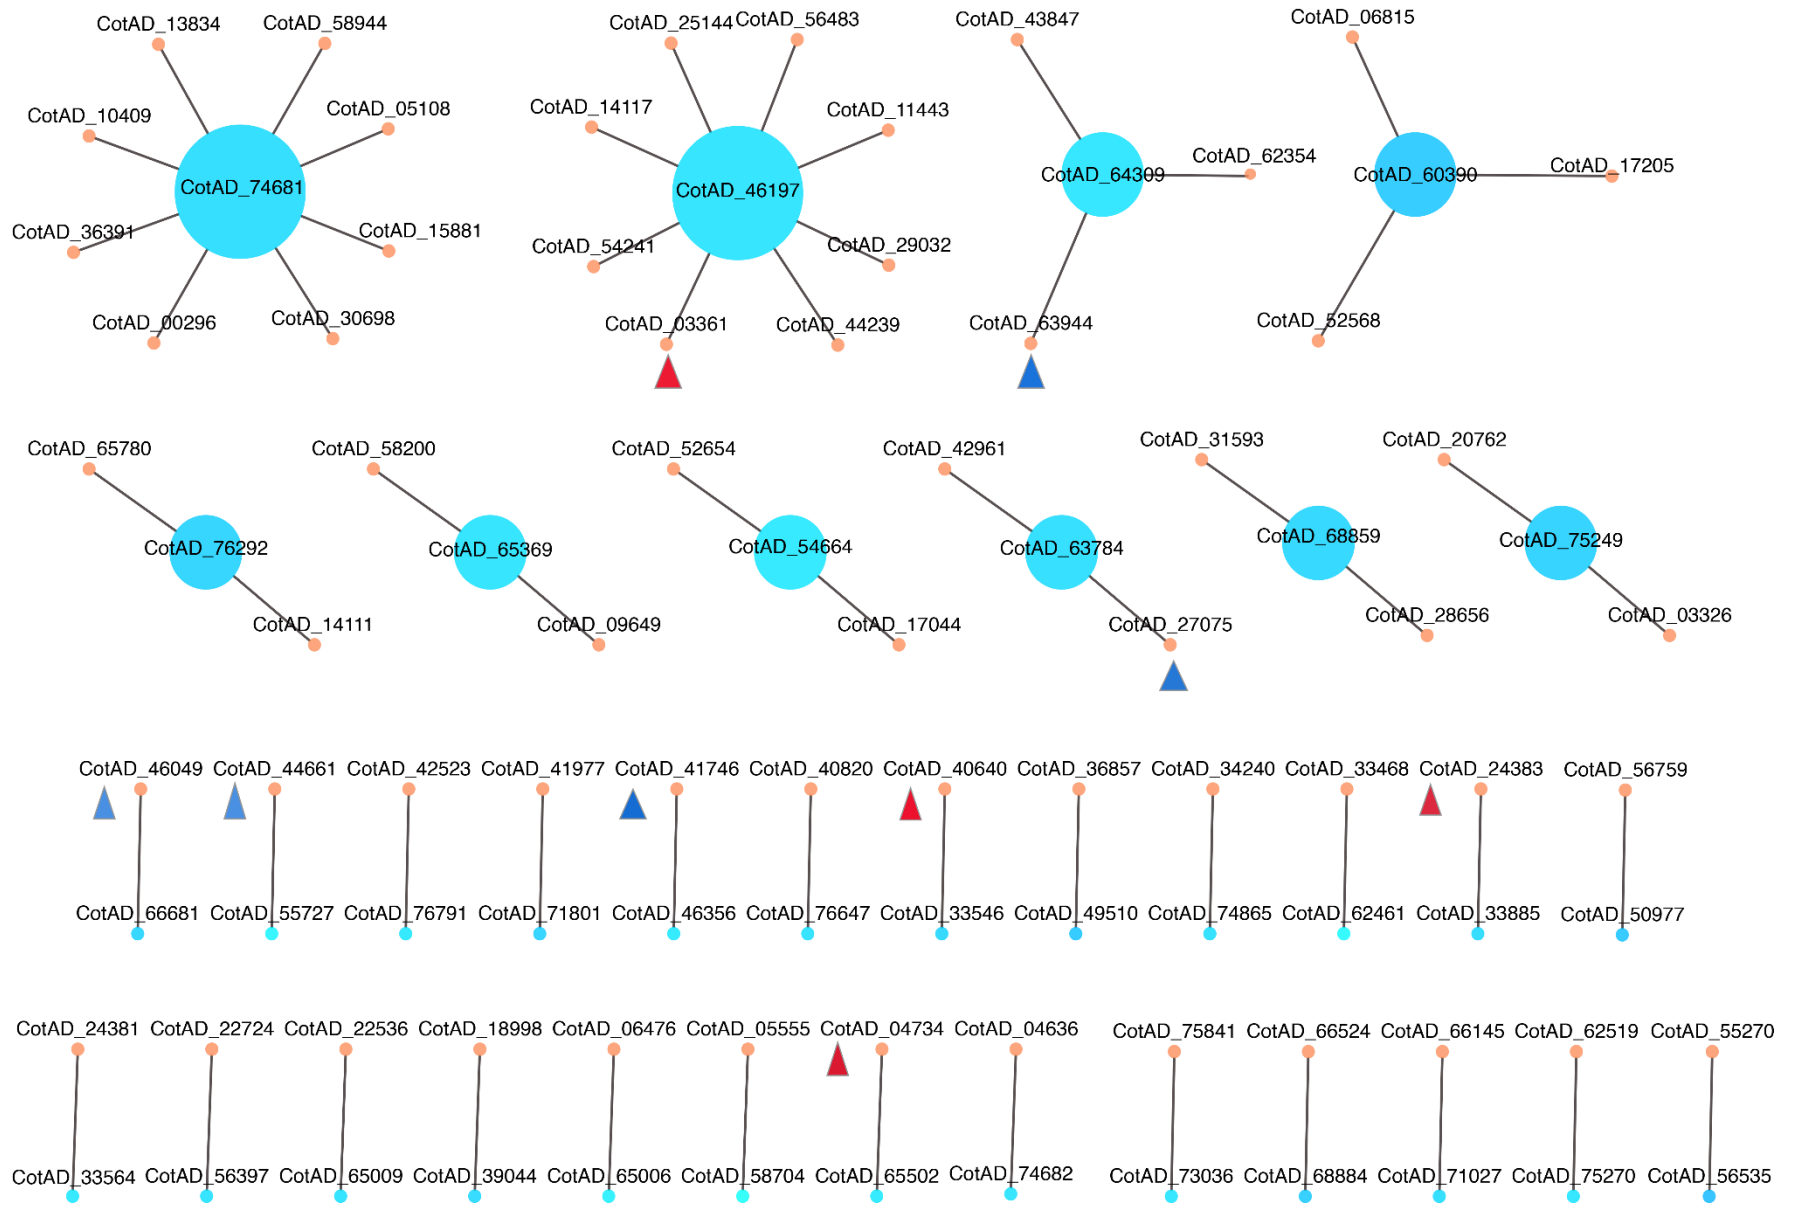

**Figure S7:** PPI network of the combination of genes and proteins that display contrasting expression patterns in the E7 and NH genotypes. The PPI interactions with a combined score greater than 160 in the STRING database were extracted to construct the network with Cytoscape version 3.5.0 (<http://www.cytoscape.org/>).

Orange boll represent DE transcripts or proteins, and blue coloring indicates the interactions of their target proteins; The red and blue triangle represent the AS-DEGs in the E7 genotype after 4 h and 24 h of salt treatment, respectively.
